# Supplementary material for: Development and Validation of a Nomogram for Predicting Postpartum Hemorrhage Following Vaginal Delivery: a Retrospective Cohort Study
Source: Research Square preprint supplement (doi:10.21203/rs.3.rs-8100815/v1), 2025-12-22
Supplement: Supplementary file 1 [file 25a8bd36b6e236abf7911afd.xlsx]

## Sheet: Table 2
Variable	Non-PPH Group (n=4242)	PPH Group (n=228)	t/χ²/Z	P-value
Age (years), mean ± SD	30.58 ± 4.22	29.85 ± 4.20	2.15	0.032
GWG (kg), mean ± SD	14.22 ± 4.28	15.15 ± 4.95	2.4	0.016
History of uterine surgery, n (%)	0.20 ± 0.56	0.85 ± 0.29	3.01	0.003
AFI (cm), mean ± SD	114.60 ± 34.35	119.90 ± 39.10	1.8	0.072
GA at delivery (weeks), mean ± SD	38.59 ± 2.05	38.65 ± 2.55	0.3	0.764
Propess placement, n (%)	328 (7.73)	28 (12.28)	2.02	0.043
Neonatal birth weight (g), mean ± SD	3255.20 ± 510.00	3385.50 ± 650.00	2.61	0.009
Duration of 1st stage (hours), mean ± SD	7.74 ± 5.96	9.45 ± 7.15	3.09	0.002
Duration of 2nd stage (hours), mean ± SD	0.71 ± 0.69	1.00 ± 1.14	3.5	0.001
Duration of 3rd stage (hours), mean ± SD	0.15 ± 0.31	0.17 ± 0.28	0.94	0.347
Nuchal cord loops, mean ± SD	0.41 ± 0.60	0.41 ± 0.61	0.02	0.984
WBC count (×10⁹/L), mean ± SD	10.30 ± 3.54	14.95 ± 4.38	13.82	<0.001
Hemoglobin (g/L), mean ± SD	111.80 ± 13.35	114.05 ± 16.20	1.81	0.07
Platelet count (×10⁹/L), mean ± SD	208.80 ± 53.90	193.50 ± 49.30	3.6	<0.001
Regular prenatal care, n (%)	3755 (88.52)	205 (89.91)	1.98	0.048
Threatened abortion, n (%)	237 (5.59)	45 (19.74)	6.55	<0.001
Placenta previa, n (%)	5 (0.12)	3 (1.32)	2.99	0.003
Placental adhesion, n (%)	75 (1.77)	10 (4.39)	2.42	0.016
Battledore/velamentous placenta, n (%)	125 (2.95)	23 (10.09)	4.6	<0.001
GDM, n (%)	790 (18.62)	45 (19.74)	4.6	<0.001
HDP, n (%)	180 (4.24)	20 (8.77)	3.45	0.001
ART, n (%)	98 (2.31)	13 (5.70)	2.85	0.004
Acute chorioamnionitis, n (%)	144 (3.39)	17 (7.46)	2.71	0.007
Vacuum extraction, n (%)	51 (1.20)	19 (8.33)	5.8	<0.001
Placental abruption, n (%)	9 (0.21)	7 (3.07)	4.28	<0.001
Manual removal of placenta, n (%)	213 (5.02)	28 (12.28)	3.58	0.001
Incomplete placenta, n (%)	75 (1.77)	12 (5.26)	2.16	0.031
Curettage, n (%)	3045 (71.78)	195 (85.53)	3.74	<0.001
Episiotomy, n (%)	960 (22.63)	100 (43.86)	6.35	<0.001
Cervical laceration, n (%)	153 (3.61)	34 (14.91)	6.28	<0.001
