# Supplementary material for: Development and Validation of a Nomogram for Predicting Postpartum Hemorrhage Following Vaginal Delivery: a Retrospective Cohort Study
Source: Research Square preprint supplement (doi:10.21203/rs.3.rs-8100815/v1), 2025-12-22
Supplement: Supplementary file 2 [file 4b7e67074418ae74ce5cac69.xlsx]

## Sheet: Table 3
Variable	Non-PPH Group (n=1817)	PPH Group (n=99)	t/χ²/Z	P-value
Age (years), mean ± SD	30.00 ± 3.77	30.65 ± 3.70	1.43	0.153
GWG (kg), mean ± SD	14.15 ± 4.28	14.18 ± 4.78	0.05	0.96
History of uterine surgery, n (%)	0.07 ± 0.27	0.22 ± 0.52	2.7	0.007
AFI (cm), mean ± SD	113.70 ± 34.85	108.90 ± 33.40	1.1	0.272
GA at delivery (weeks), mean ± SD	38.57 ± 2.12	38.77 ± 1.89	0.78	0.435
Propess placement, n (%)	142 (7.82)	15 (15.15)	1.83	0.067
Neonatal birth weight (g), mean ± SD	3239.50 ± 537.00	3374.00 ± 498.00	2.08	0.038
Duration of 1st stage (hours), mean ± SD	8.10 ± 6.42	10.40 ± 8.75	2.28	0.023
Duration of 2nd stage (hours), mean ± SD	0.80 ± 1.00	0.97 ± 0.88	1.51	0.131
Duration of 3rd stage (hours), mean ± SD	0.24 ± 0.21	0.28 ± 0.32	0.97	0.332
Nuchal cord loops, mean ± SD	0.39 ± 0.56	0.34 ± 0.56	0.72	0.472
WBC count (×10⁹/L), mean ± SD	10.32 ± 3.29	15.45 ± 4.75	9.35	<0.001
Hemoglobin (g/L), mean ± SD	111.65 ± 16.85	112.30 ± 16.80	0.32	0.749
Platelet count (×10⁹/L), mean ± SD	206.20 ± 51.90	186.20 ± 57.20	3.11	0.002
Regular prenatal care, n (%)	1618 (89.05)	87 (87.88)	1.38	0.168
Threatened abortion, n (%)	102 (5.61)	17 (17.17)	3.83	<0.001
Placenta previa, n (%)	18 (0.99)	4 (4.04)	1.74	0.082
Placental adhesion, n (%)	36 (1.98)	9 (9.09)	2.88	0.004
Battledore/velamentous placenta, n (%)	68 (3.74)	5 (5.05)	0.39	0.697
GDM, n (%)	316 (17.39)	26 (26.26)	1.86	0.063
HDP, n (%)	60 (3.30)	7 (7.07)	1.61	0.107
ART, n (%)	42 (2.31)	6 (6.06)	1.78	0.075
Acute chorioamnionitis, n (%)	75 (4.13)	12 (12.12)	2.86	0.004
Vacuum extraction, n (%)	32 (1.76)	7 (7.07)	2.73	0.006
Placental abruption, n (%)	28 (1.54)	3 (3.03)	1.23	0.219
Manual removal of placenta, n (%)	69 (3.80)	19 (19.19)	5.25	<0.001
Incomplete placenta, n (%)	42 (2.31)	8 (8.08)	1.63	0.103
Curettage, n (%)	1210 (66.59)	90 (90.91)	4.43	<0.001
Episiotomy, n (%)	417 (22.95)	35 (35.35)	2.43	0.015
Cervical laceration, n (%)	51 (2.81)	6 (6.06)	1.43	0.152
