# Supplementary material for: Development and Validation of a Nomogram for Predicting Postpartum Hemorrhage Following Vaginal Delivery: a Retrospective Cohort Study
Source: Research Square preprint supplement (doi:10.21203/rs.3.rs-8100815/v1), 2025-12-22
Supplement: Supplementary file 3 [file 6be3cf3341fb19dcc47dc2ac.xlsx]

## Sheet: Table 4
Variable	OR (95% CI)	P-value
Age	0.960 (0.924 - 0.995)	0.032
Regular prenatal care	1.820 (1.000 - 3.310)	0.05
Threatened abortion	4.060 (2.580 - 6.390)	<0.001
GWG (kg)	1.045 (1.011 - 1.080)	0.009
History of uterine surgery	2.085 (1.470 - 2.955)	<0.001
AFI (cm)	1.004 (1.000 - 1.008)	0.05
Placenta previa	14.100 (1.460 - 136.200)	0.023
Placental adhesion	2.690 (1.170 - 6.180)	0.02
Battledore/velamentous placenta	3.720 (2.040 - 6.780)	<0.001
HDP	2.610 (1.480 - 4.600)	0.001
ART	2.760 (1.330 - 5.720)	0.006
Propess placement	1.655 (1.010 - 2.705)	0.044
Neonatal birth weight (g)	1.001 (1.000 - 1.001)	0.002
Acute chorioamnionitis	2.350 (1.240 - 4.450)	0.009
Vacuum extraction	7.280 (3.320 - 15.970)	<0.001
Placental abruption	14.300 (2.870 - 71.200)	0.001
Manual removal of placenta	2.450 (1.475 - 4.070)	0.001
Incomplete placenta	0.418 (0.190 - 0.920)	0.032
Curettage	2.165 (1.430 - 3.275)	<0.001
Duration of 1st stage (hours)	1.039 (1.016 - 1.063)	0.001
Duration of 2nd stage (hours)	1.480 (1.243 - 1.760)	<0.001
Episiotomy	2.720 (1.975 - 3.745)	<0.001
Cervical laceration	4.630 (2.730 - 7.830)	<0.001
WBC count (×10⁹/L)	1.304 (1.248 - 1.362)	<0.001
Hemoglobin (g/L)	1.011 (1.000 - 1.022)	0.04
Platelet count (×10⁹/L)	0.994 (0.991 - 0.997)	<0.001
