# Supplementary material for: Development and Validation of a Nomogram for Predicting Postpartum Hemorrhage Following Vaginal Delivery: a Retrospective Cohort Study
Source: Research Square preprint supplement (doi:10.21203/rs.3.rs-8100815/v1), 2025-12-22
Supplement: Supplementary file 4 [file aa8c74b7287124820a37a6e5.xlsx]

## Sheet: Table 1
Variable	Training Cohort (n=4470)	Validation Cohort (n=1916)	t/χ²/Z	P-value
Maternal Characteristics
Age (years), mean ± SD	30.45 ± 4.20	30.15 ± 3.80	1.58	0.114
Regular prenatal care, n (%)	3960 (88.59)	1705 (88.99)	0.28	0.779
Threatened abortion, n (%)	282 (6.31)	119 (6.21)	0.15	0.881
Vaginal fluid leakage, n (%)	797 (17.83)	341 (17.80)	1.38	0.168
GWG (kg), mean ± SD	14.38 ± 4.40	14.16 ± 4.35	0.91	0.363
History of uterine surgery, n (%)	0.12 ± 0.36	0.10 ± 0.33	0.24	0.81
Gravidity, mean ± SD	2.11 ± 1.22	2.10 ± 1.18	0.02	0.984
Parity, mean ± SD	0.53 ± 0.63	0.49 ± 0.60	1.24	0.215
Number of abortions, mean ± SD	0.57 ± 0.87	0.61 ± 0.86	0.92	0.358
Placental & Pregnancy Information
AFI (cm), mean ± SD	115.50 ± 35.20	112.90 ± 34.60	1.38	0.168
Placenta previa, n (%)	8 (0.18)	22 (1.15)	2.42	0.016
Placental adhesion, n (%)	85 (1.90)	45 (2.35)	1.65	0.099
Battledore/velamentous placenta, n (%)	148 (3.31)	73 (3.81)	0.21	0.834
GDM, n (%)	835 (18.68)	342 (17.85)	0.01	0.995
HDP, n (%)	200 (4.47)	67 (3.50)	1.02	0.308
Hypothyroidism, n (%)	402 (8.99)	152 (7.93)	0.94	0.347
Twin pregnancy, n (%)	67 (1.50)	20 (1.04)	0.97	0.332
ART, n (%)	111 (2.48)	48 (2.51)	0.02	0.984
Scarred uterus, n (%)	66 (1.48)	31 (1.62)	0.08	0.936
Uterine fibroids, n (%)	85 (1.90)	24 (1.25)	0.98	0.327
Uterine septum, n (%)	12 (0.27)	10 (0.52)	0.72	0.472
Rh-negative blood type, n (%)	45 (1.01)	28 (1.46)	0.64	0.522
Intrapartum & Neonatal Characteristics
GA at delivery (weeks), mean ± SD	38.60 ± 2.15	38.61 ± 2.08	0.01	0.992
Propess placement, n (%)	356 (7.96)	157 (8.19)	0.29	0.772
Neonatal birth weight (g), mean ± SD	3278.50 ± 540.00	3263.20 ± 533.00	0.5	0.617
Vacuum extraction, n (%)	70 (1.57)	39 (2.04)	0.34	0.734
Placental abruption, n (%)	16 (0.36)	31 (1.62)	2.06	0.039
Manual removal of placenta, n (%)	241 (5.39)	88 (4.59)	0.08	0.937
Incomplete placenta, n (%)	87 (1.95)	50 (2.61)	1.1	0.271
Curettage, n (%)	3240 (72.48)	1300 (67.85)	1.33	0.183
Duration of 1st stage (hours), mean ± SD	8.04 ± 6.20	8.50 ± 6.95	1.25	0.211
Duration of 2nd stage (hours), mean ± SD	0.76 ± 0.80	0.82 ± 0.98	1.25	0.21
Duration of 3rd stage (hours), mean ± SD	0.16 ± 0.29	0.25 ± 0.24	1.8	0.072
Nuchal cord loops, mean ± SD	0.41 ± 0.60	0.38 ± 0.56	1.09	0.276
Episiotomy, n (%)	1060 (23.71)	452 (23.59)	0.51	0.61
Cervical laceration, n (%)	187 (4.18)	57 (2.97)	1.85	0.064
Prenatal Laboratory Values
WBC count (×10⁹/L), mean ± SD	11.12 ± 4.10	11.22 ± 4.08	0.44	0.66
Hemoglobin (g/L), mean ± SD	112.20 ± 13.90	111.80 ± 16.85	0.48	0.631
Platelet count (×10⁹/L), mean ± SD	206.20 ± 53.40	202.70 ± 53.35	1.18	0.238
GBS infection, n (%)	140 (3.13)	55 (2.87)	0.39	0.696
