# Supplementary material for: Development and Validation of a Nomogram for Predicting Postpartum Hemorrhage Following Vaginal Delivery: a Retrospective Cohort Study
Source: Research Square preprint supplement (doi:10.21203/rs.3.rs-8100815/v1), 2025-12-22
Supplement: Supplementary file 5 [file bd366c20a7a9af7da00a24fc.xlsx]

## Sheet: Table 5
Variable	β	OR (95% CI)	P-value
Threatened abortion	0.947	2.578 (1.432 - 4.640)	0.002
History of uterine surgery	0.848	2.335 (1.485 - 3.670)	<0.001
AFI (cm)	0.007	1.007 (1.001 - 1.012)	0.012
Battledore/velamentous placenta	1.5	4.480 (2.135 - 9.400)	<0.001
ART	1.045	2.845 (1.078 - 7.510)	0.035
Propess placement	0.894	2.445 (1.312 - 4.555)	0.005
Neonatal birth weight (g)	0.001	1.001 (1.001 - 1.001)	<0.001
Placental abruption	2.41	11.150 (1.885 - 65.800)	0.008
Episiotomy	0.52	1.682 (1.120 - 2.525)	0.012
WBC count (×10⁹/L)	0.302	1.353 (1.287 - 1.422)	<0.001
Hemoglobin (g/L)	0.017	1.017 (1.004 - 1.030)	0.009
Platelet count (×10⁹/L)	-0.01	0.990 (0.986 - 0.994)	<0.001
